# Supplementary material for: A simple preparation of a F-TiO2-HNT superamphiphobic surface with a tube-point-like micro/nano hierarchical structure for self-cleaning and anti-fouling
Source: Royal Society of Chemistry journal article supplement (doi:10.1039/d3nj01509b), 2023-01-01
Supplement: d3nj01509b9.pdf [file d3nj01509b9.pdf]

## Supporting Information

### **A simple preparation of F-TiO<sub>2</sub>-HNT superamphiphobic surface with tube-point-like micro/nano hierarchical structure for self-cleaning and anti-fouling**

Wen Si<sup>a</sup>, Jun Wu,<sup>a\*</sup> Zhiguang Guo<sup>a,b\*</sup>

<sup>a</sup> Ministry of Education Key Laboratory for the Green Preparation and Application of Functional Materials, Hubei University, Wuhan 430062, People's Republic of China.

<sup>b</sup> State Key Laboratory of Solid Lubrication, Lanzhou Institute of Chemical Physics, Chinese Academy of Sciences, Lanzhou 730000, People's Republic of China.

#### **\*Corresponding Author**

Zhiguang Guo – [orcid.org/0000-0002-4438-3344](https://orcid.org/0000-0002-4438-3344); Phone: +86-931-4968105; Email: [zguo@licp.cas.cn](mailto:zguo@licp.cas.cn); Fax: +86-931-8277088

#### Experimental section

##### 1.1 Materials.

Tetrabutyl titanate (TBT) (98.5%), isopropanol, hydrochloric acid, ammonia water, sodium hydroxide, and sodium chloride were purchased from China National Medicines Corporation Ltd. Tetraethyl orthosilicate (TEOS), methylene blue, glycol, rapeseed oil, 1H,1H,2H,2H-perfluorodecyltriethoxysilane (PFDTES) were provided by Aladdin Reagent Co. Ltd, China. Carbon black was purchased from Anhui Zesheng Technology Co., LTD. Halloysite nanotube (HNT) was purchased from Xi'an Minchuangda Biotechnology Co., LTD. Glycerol (98.5%), 85% phosphoric acid, and aluminium hydroxide were obtained from Alfa Aesar. All chemicals were of analytical grade without further purification.

##### 1.2 Preparation of F-TiO<sub>2</sub>-HNT superamphiphobic powder.

2 ml of tetrabutyl titanate was dispersed in isopropanol with 0.4 g, 0.7 g and 1 g of HNTs, respectively. The solution pH was adjusted to about 4 with 1 M HCl solution, and the

hydrothermal reaction was carried out at 160 °C for 24 h followed by centrifugation. Three TiO<sub>2</sub>-HNTs (TH) hybridized powders (TH-0.4, TH-0.7, and TH-1) were obtained after drying. Then, the TH powder was dispersed into ethanol, ammonia, and deionized water, and tetraethyl orthosilicate (TEOS) and 1H,1H,2H,2H-perfluorodecyltriethoxysilane (PFDTES) were added to the suspension in appropriate amounts for six hours (see Table S1 for the formulation) and then centrifuged and separated. After vacuum drying, FTH superamphiphobic powder was obtained.

### 1.3 Preparation of the aluminum phosphate (AP) binder.

The aluminum phosphate (AP) binder was prepared through the conventional synthesis of an inorganic binder. The orthophosphoric acid with 85wt.% in water was diluted to 60 wt.% by adding deionized water. Then, aluminum hydroxide was added into dilute orthophosphoric acid in a molar ratio of 3:1, followed by stirring at 100 °C for 3 hours

### 1.4 Preparation of F-TiO<sub>2</sub>-HNT superamphiphobic surface

The prepared AP binder dispersion (2 g) was mixed with 5 ml deionized water, stirred for 5 min and sonicated for 10 min at room temperature to form solution A. Meanwhile, FTH superamphiphobic powders (1 g) were dissolved in anhydrous ethanol (15 ml) under stirring and sonicated for 10 min to form solution B. Solution A and solution B are mixed and stirred for 10 min to obtain solution C for a subsequent experiment. Finally, the suspension containing superamphiphobic particles was sprayed onto the original copper foam for several times by a spray gun until the surface was completely and evenly covered by F-TiO<sub>2</sub>-HNT particles. The sprayed copper foam was put into an oven at 80°C for 2h to obtain the superamphiphobic copper foam surface.

The surface of superamphiphobic slides was prepared by sieving deposition. It is suitable for vials containing FTH powder. The bottle has a perforated cap with a stainless-steel mesh so that the powder can be easily deposited on a binder-treated surface such as spray or double-sided glue through a sifting action.

**Table S1 Six groups of fluorinated formulations**

|       | TH<br>(g) | Et2O<br>(ml) | NH3·H2O<br>(ml) | DI<br>(ml) | TEOS<br>(μl) | PFDTES<br>(μl) |
|-------|-----------|--------------|-----------------|------------|--------------|----------------|
| FTH-1 | 0.3       | 80           | 6               | 6          | 500          | 50             |
| FTH-2 | 0.3       | 80           | 6               | 6          | 300          | 50             |
| FTH-3 | 0.3       | 80           | 6               | 6          | 100          | 50             |
| FTH-4 | 0.3       | 80           | 6               | 6          | 100          | 90             |
| FTH-5 | 0.3       | 80           | 6               | 6          | 100          | 70             |
| FTH-6 | 0.3       | 80           | 6               | 6          | 100          | 30             |

**Table S2 The superamphiphobic surfaces based on nanotubes or nanowires**

| Nanotube                  | Reentrant structure                        | Preparation method                                          | CA/°                                  | Characteristic                                   | Ref. |
|---------------------------|--------------------------------------------|-------------------------------------------------------------|---------------------------------------|--------------------------------------------------|------|
| SiO <sub>2</sub> nanotube | Crosslinked nanotubes                      | Stencil                                                     | WCA=162.2±1.0                         | Transparent                                      | [1]  |
|                           |                                            | Removal                                                     | n-decane=154.8±1.0                    | Heat-resistant liquid                            |      |
| HNT                       | Crosslinked nanotubes                      | Surface Modification                                        | WCA=172<br>n-hexadecane=160°          | chemical durability                              | [2]  |
| SiO <sub>2</sub> nanotube | Crosslinked nanotubes                      | Stencil                                                     | WCA=166.8                             | transparent                                      | [3]  |
|                           |                                            | Removal                                                     | n-octane=155.6                        |                                                  |      |
| MWCNTs                    | Crosslinked nanotubes                      | Surface Modification                                        | WCA=172.2±4.2                         | repelling both cool                              | [4]  |
|                           |                                            |                                                             | n-octane=157.9±2.7                    | and hot liquids                                  |      |
| ZnO@HNTs                  | rod-dot micro/nano hierarchical structures | Sol-gel                                                     | WCA=165.2±1.0<br>rapeseed oil=154±0.9 | Superhydrophobic<br>even after 1h UV irradiation | [5]  |
| SiO <sub>2</sub> @HNTs    | rod-dot micro/nano hierarchical structures | Hydrolytic condensation                                     | WCA≥150                               | UV resistant,                                    | [6]  |
|                           |                                            |                                                             | n-heptane≥150                         | chemically durable                               |      |
| MWCNTs                    | Crosslinked nanotubes                      | Fluoridation treatment                                      | WCA=172<br>n-cetane=163               | chemically durable                               | [7]  |
| AgNPs@ACN                 | Crosslinked nanotubes                      | Electrostatic spinning                                      | WCA≥165<br>n-Dodecane≥165             | Sensing properties                               | [8]  |
| PANI/fCNTs                | Core-shell structure                       | in situ polymerization, Acid corrosion, hydrothermal method | WCA=167<br>glycerin>150               | High temperature and corrosion resistance        | [9]  |

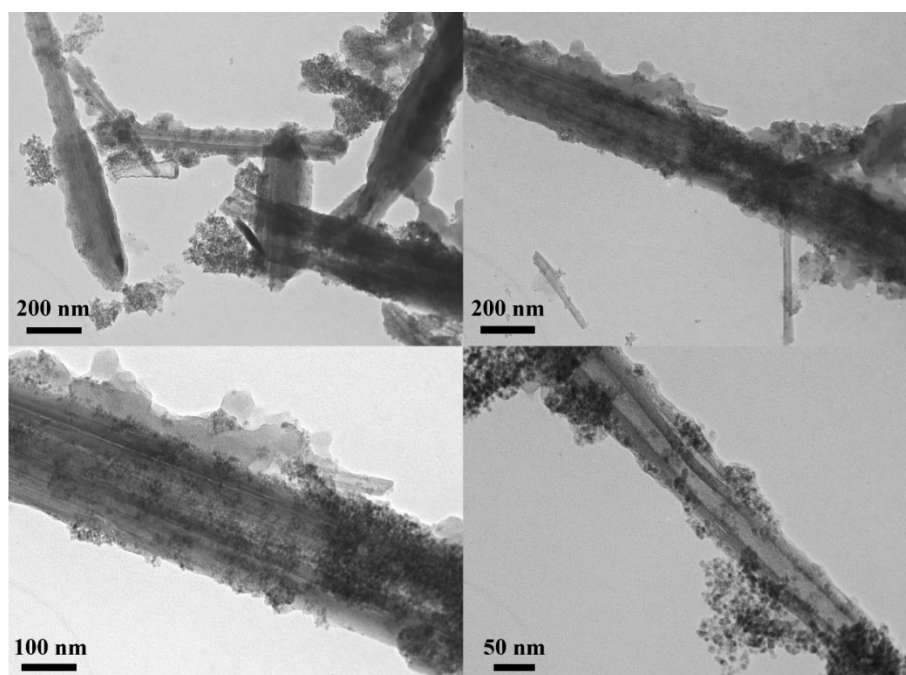

Figure S1. Transmission Electron Microscopy (TEM) image of FTH-4 powder

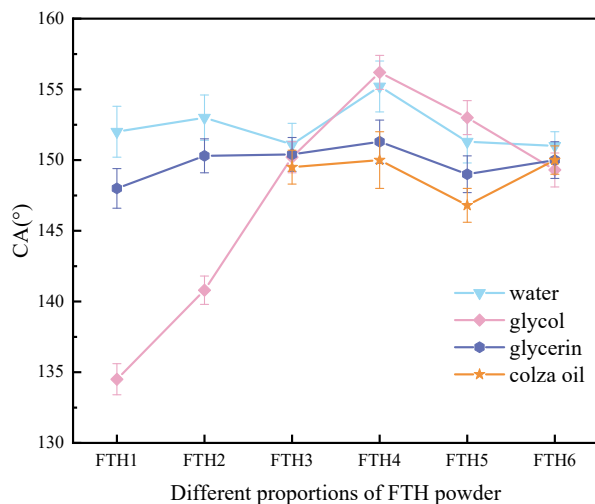

Figure S2. The contact angle of FTH1~6 for water and three oils

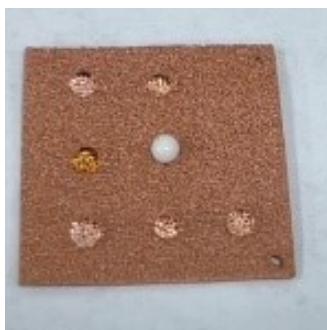

Figure S3. Optical photograph of seven types of water/oil droplets on a surface of superamphiphobic foam copper

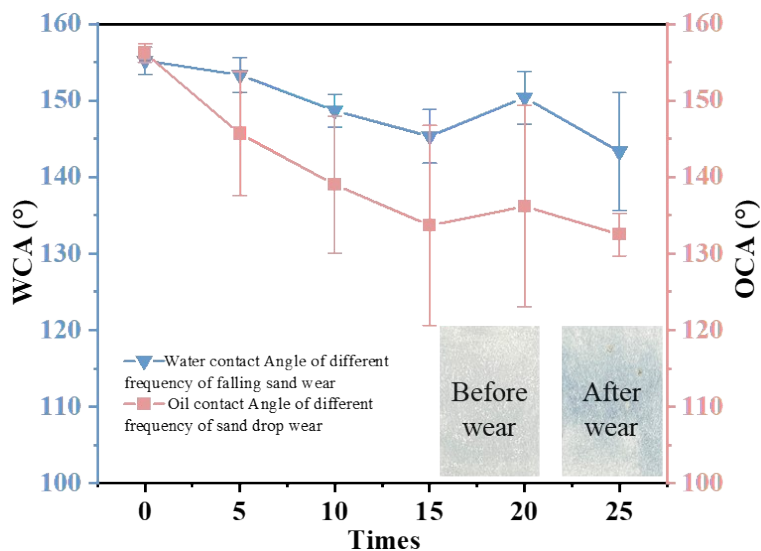

Figure.S4 Water contact Angle and oil contact Angle after falling sand wear, the lower right corner is the optical photos before and after wear.

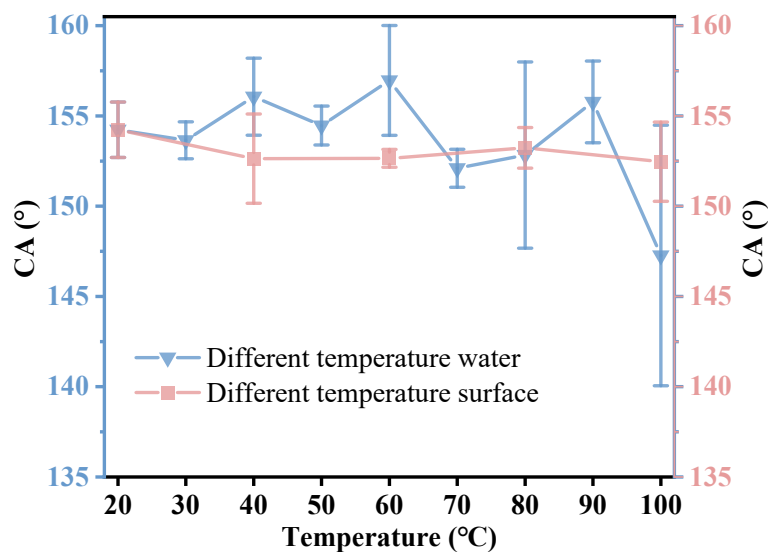

Figure.S5 Contact angles of water at different temperatures and water contact angles of superamphiphobic surfaces at different temperatures

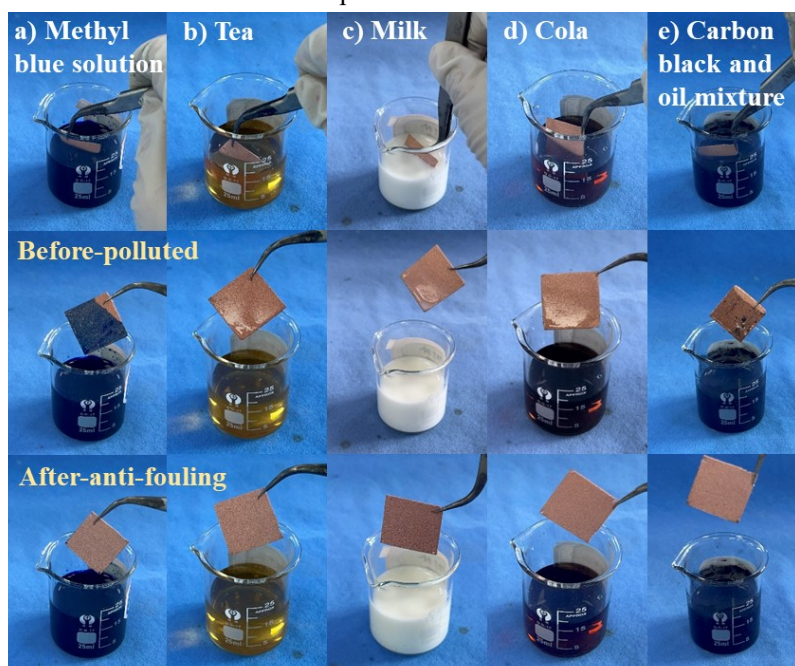

Figure S6. Antifouling test of superamphiphobic foam copper immersed in five kinds of sewage. (a) methyl blue aqueous solution; (b) Tea; (c) Milk; (d) Cola; (e) Carbon black mixed with rapeseed oil solution.

Movie S1-S3. FTH superamphiphobic surface is self-cleaning. (S1) Methyl blue; (S2) Carbon black; (S3) Sand.

Movie S4-S8 FTH superamphiphobic surface anti-fouling. (S4) Methyl blue; (S5) Cola; (S6) Tea; (S7) Milk; (S8) Carbon black mixed with rapeseed oil solution.

[1] Zhang J, Yu B, Gao Z, Li B, Zhao X. Durable, Transparent, and Hot Liquid Repelling Superamphiphobic Coatings from Polysiloxane-Modified Multiwalled Carbon Nanotubes. Langmuir.

2017;33:510-8.

- [2] Ma W, Higaki Y, Takahara A. Superamphiphobic Coatings from Combination of a Biomimetic Catechol-Bearing Fluoropolymer and Halloysite Nanotubes. *Advanced Materials Interfaces*. 2017;4.
- [3] Zhang J, Yu B, Wei Q, Li B, Li L, Yang Y. Highly transparent superamphiphobic surfaces by elaborate microstructure regulation. *J Colloid Interface Sci*. 2019;554:250-9.
- [4] Zhai N, Fan L, Li L, Zhang J. Durable superamphiphobic coatings repelling both cool and hot liquids based on carbon nanotubes. *J Colloid Interface Sci*. 2017;505:622-30.
- [5] Xu W, Xu L, Pan H, Wang L, Shen Y. Superamphiphobic cotton fabric with photocatalysis and ultraviolet shielding property based on hierarchical ZnO/halloysite nanotubes hybrid particles. *Colloids and Surfaces A: Physicochemical and Engineering Aspects*. 2022;654.
- [6] Wang K, Liu X, Tan Y, Zhang W, Zhang S, Li J, et al. Highly fluorinated and hierarchical HNTs/SiO<sub>2</sub> hybrid particles for substrate-independent superamphiphobic coatings. *Chemical Engineering Journal*. 2019;359:626-40.
- [7] Zhang D, Wu G, Li H, Cui Y, Zhang Y. Superamphiphobic surfaces with robust self-cleaning, abrasion resistance and anti-corrosion. *Chemical Engineering Journal*. 2021;406.
- [8] Tian S, Wang X, Qin W, Yin S, Tan T, Tian Y, et al. Ultra-robust, stretchable electrodes based on superamphiphobic surface for personal exercise monitoring. *Chemical Engineering Journal*. 2023;452.
- [9] Yuan R, Wu S, Yu P, Wang B, Mu L, Zhang X, et al. Superamphiphobic and Electroactive Nanocomposite toward Self-Cleaning, Antiwear, and Anticorrosion Coatings. *ACS Appl Mater Interfaces*. 2016;8:12481-93.
